# Supplementary material for: Hydrophobic dual-polymer–reinforced graphene composite aerogel for efficient water–oil separation
Source: Royal Society of Chemistry journal article supplement (doi:10.1039/d4ra06747a), 2025-01-01
Supplement: d4ra06747a7.pdf [file d4ra06747a7.pdf]

## Electronic Supplementary Information

### **Hydrophobic dual-polymer-reinforced graphene composite aerogel for efficient water-oil separation**

Zirong Luo<sup>1,\*</sup>, Shenbo Huang<sup>2</sup>, Na Kong<sup>3</sup>, Jizhen Zhang<sup>4</sup>, Jinlong Tao<sup>1,\*</sup>, Jihua Li<sup>5</sup>,  
Shuang Li<sup>1</sup>

<sup>1</sup> Hainan Provincial Key Laboratory of Natural Rubber Processing, Agricultural Products Processing Research Institute, Chinese Academy of Tropical Agricultural Sciences, Zhanjiang 524001, P. R. China

<sup>2</sup> Guangdong Engineering & Technology Research Centre of Graphene-like Materials and Products, Department of Chemistry, College of Chemistry and Materials Science, Jinan University, Guangzhou 510632, P. R. China

<sup>3</sup> School of Life and Environmental Science, Centre for Sustainable Bioproducts, Deakin University, Geelong, Victoria 3216, Australia

<sup>4</sup> Institute for Frontier Materials, Deakin University, Geelong, Victoria 3216, Australia

<sup>5</sup> Chinese Academy of Tropical Agricultural Sciences, Haikou 571101, P. R. China

\* Corresponding author.

E-mail address: luozirong3@163.com (Z.R. Luo), jinlongt1983@163.com (J.L. Tao)

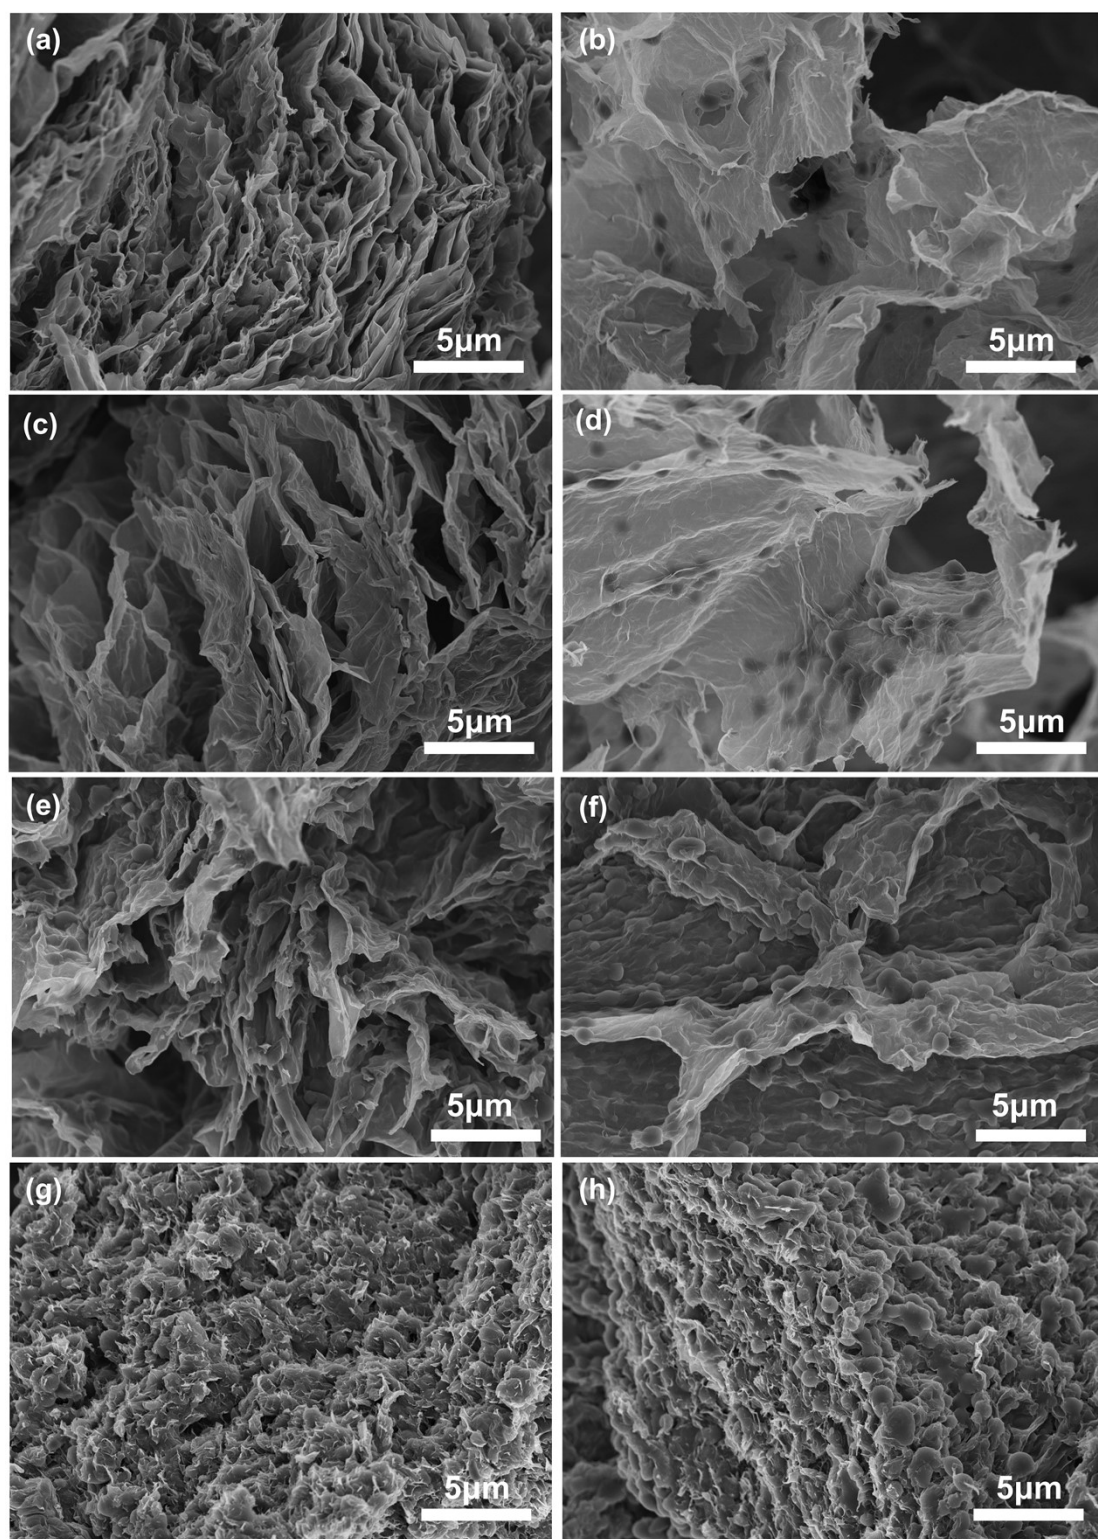

**Fig. S1.** SEM images of (a-b) EGA<sub>20%</sub>, (c-d) EGA<sub>40%</sub> (e-f) EGA<sub>60%</sub>, (g-h) EGA<sub>80%</sub> aerogel.

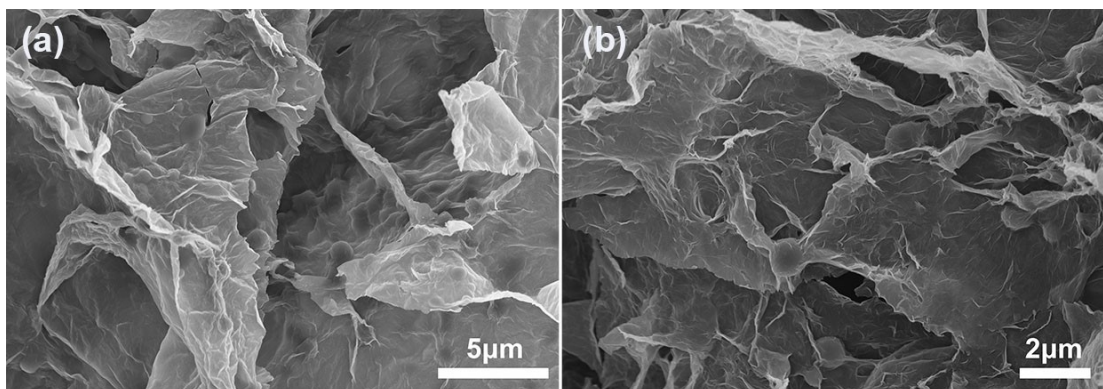

**Fig. S2.** (a-b) SEM images of external surface of P@EGA.

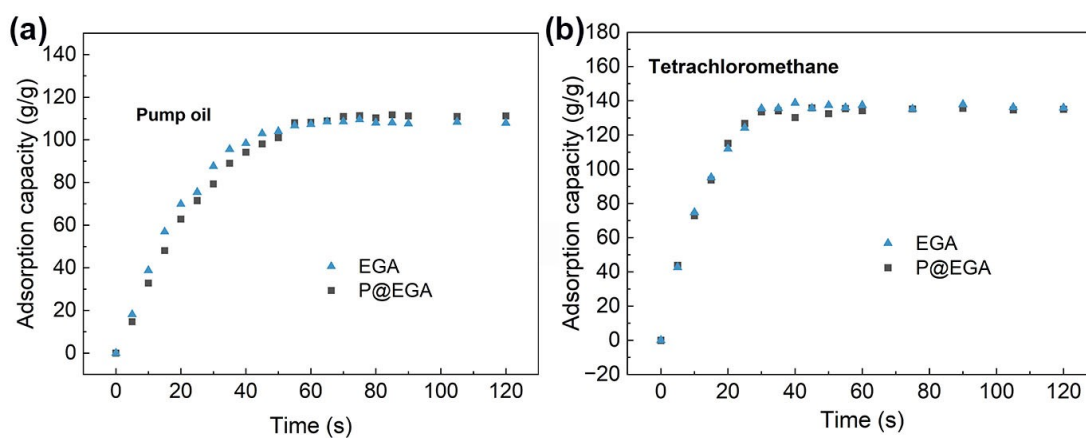

**Fig. S3.** Adsorption capacity of EGA and P@EGA for (a) pump oil and (b) tetrachloromethane at different adsorption time intervals..

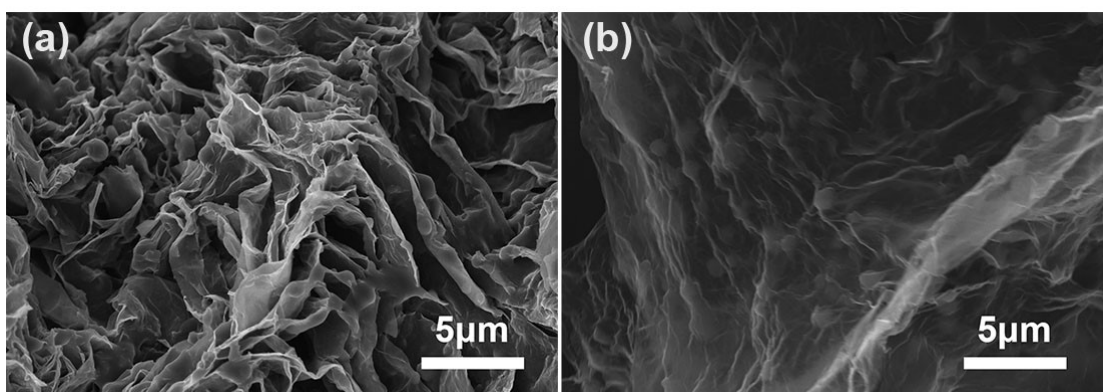

**Fig. S4.** (a-b) SEM images of P@EGA aerogel after the tenth cycles of adsorption-

---

desorption.
